# Supplementary material for: Past mercury exposure and current symptoms of nervous system dysfunction in adults of a First Nation community (Canada)
Source: PubMed Central journal article supplement (PMC8925187; doi:10.1186/s12940-022-00838-y), 2022-03-16
Supplement: 12940_2022_838_MOESM1_ESM.pdf [file 12940_2022_838_MOESM1_ESM.pdf]

## Additional File 1

**Supplementary Table 1. Characteristics of symptom clusters**

|                                             | Chronbach<br>alpha<br>(IC 95%) | Correlation<br>within<br>cluster | Reported<br>Very often or All the time |               |               | Difference<br>Chi-square/<br>Fisher's<br>Exact test<br>p-value |
|---------------------------------------------|--------------------------------|----------------------------------|----------------------------------------|---------------|---------------|----------------------------------------------------------------|
|                                             |                                |                                  | Overall                                | Women         | Men           |                                                                |
| <b>Cluster 1: Extrapyramidal Impairment</b> |                                |                                  |                                        |               |               |                                                                |
|                                             | 0.91 (0.90-0.92)               |                                  |                                        |               |               |                                                                |
| Pain in arms                                |                                | 0.80                             | 44<br>(11.5%)                          | 28<br>(13.7%) | 16<br>(9.0%)  | 0.19                                                           |
| Pain in legs                                |                                | 0.80                             | 75<br>(19.6%)                          | 52<br>(25.2%) | 23<br>(13.1%) | 0.003                                                          |
| Drop things                                 |                                | 0.75                             | 53<br>(13.9%)                          | 37<br>(17.9%) | 16<br>(9.2%)  | 0.017                                                          |
| Feet tremors                                |                                | 0.77                             | 25<br>(6.6%)                           | 13<br>(6.4%)  | 12<br>(6.8%)  | 0.873                                                          |
| Stiff shoulders                             |                                | 0.75                             | 51<br>(13.4%)                          | 33<br>(16.1%) | 18<br>(10.2%) | 0.099                                                          |
| Burning feet                                |                                | 0.75                             | 48<br>(12.7%)                          | 34<br>(16.8%) | 14<br>(8.0%)  | 0.01                                                           |
| Stumble                                     |                                | 0.78                             | 39<br>(10.1%)                          | 21<br>(10.2%) | 18<br>(10.1%) | 0.992                                                          |
| Stop or freeze                              |                                | 0.74                             | 14<br>(3.7%)                           | 10<br>(4.9%)  | 4<br>(2.3%)   | 0.275                                                          |
| Fall                                        |                                | 0.75                             | 19<br>(5.0%)                           | 14<br>(6.8%)  | 5<br>(2.8%)   | 0.099                                                          |

|                                      | Chronbach<br>alpha<br>(IC 95%) | Correlation<br>within<br>cluster | Reported<br>Very often or All the time |               |               | Difference<br>Chi-square/<br>Fisher's<br>Exact test<br>p-value |
|--------------------------------------|--------------------------------|----------------------------------|----------------------------------------|---------------|---------------|----------------------------------------------------------------|
|                                      |                                |                                  | Overall                                | Women         | Men           |                                                                |
| <b>Cluster 2: Sensory Impairment</b> |                                |                                  |                                        |               |               |                                                                |
|                                      | 0.94 (0.93-0.95)               |                                  |                                        |               |               |                                                                |
| Numbness in hands                    |                                | 0.88                             | 53<br>(14.0%)                          | 37<br>(18.1%) | 16<br>(9.1%)  | 0.01                                                           |
| Numbness in feet                     |                                | 0.89                             | 56<br>(14.7%)                          | 34<br>(16.5%) | 22<br>(12.5%) | 0.268                                                          |
| Dull feeling in hands                |                                | 0.88                             | 44<br>(11.7%)                          | 27<br>(13.3%) | 17<br>(9.8%)  | 0.285                                                          |
| Dull feeling in feet                 |                                | 0.87                             | 46<br>(12.1%)                          | 30<br>(14.6%) | 16<br>(9.1%)  | 0.102                                                          |
| Tingling in hands                    |                                | 0.87                             | 54<br>(14.2%)                          | 33<br>(16.1%) | 21<br>(12.0%) | 0.243                                                          |
| Tingling in feet                     |                                | 0.87                             | 53<br>(13.8%)                          | 34<br>(16.5%) | 19<br>(10.7%) | 0.1                                                            |

|                                               | Chronbach<br>alpha<br>(IC 95%) | Correlation<br>within<br>cluster | Reported<br>Very often or All the time |               |              | Difference<br>Chi-square/<br>Fisher's<br>Exact test<br>p-value |
|-----------------------------------------------|--------------------------------|----------------------------------|----------------------------------------|---------------|--------------|----------------------------------------------------------------|
|                                               |                                |                                  | Overall                                | Women         | Men          |                                                                |
| <b>Cluster 3 : Cranial nerve disturbances</b> |                                |                                  |                                        |               |              |                                                                |
|                                               | 0.85 (0.83-0.88)               |                                  |                                        |               |              |                                                                |
| Loss of taste                                 |                                | 0.85                             | 23<br>(6.0%)                           | 17<br>(8.3%)  | 6<br>(3.4%)  | 0.053                                                          |
| Loss of smell                                 |                                | 0.82                             | 26<br>(6.8%)                           | 16<br>(7.8%)  | 10<br>(5.7%) | 0.423                                                          |
| Difficulty swallowing                         |                                | 0.81                             | 33<br>(8.6%)                           | 23<br>(11.2%) | 10<br>(5.7%) | 0.068                                                          |
| Tingling around mouth                         |                                | 0.73                             | 24<br>(6.3%)                           | 17<br>(8.3%)  | 7<br>(4.0%)  | 0.094                                                          |
| Choking                                       |                                | 0.81                             | 15<br>(3.9%)                           | 12<br>(5.8%)  | 3<br>(1.7%)  | 0.061                                                          |

|                                              | Chronbach<br>alpha<br>(IC 95%) | Correlation<br>within<br>cluster | Reported<br>Very often or All the time |               |               | Difference<br>Chi-square/<br>Fisher's<br>Exact test<br>p-value |
|----------------------------------------------|--------------------------------|----------------------------------|----------------------------------------|---------------|---------------|----------------------------------------------------------------|
|                                              |                                |                                  | Overall                                | Women         | Men           |                                                                |
| <b>Cluster 4: Gross motor impairment</b>     |                                |                                  |                                        |               |               |                                                                |
|                                              | 0.89 (0.88-0.91)               |                                  |                                        |               |               |                                                                |
| Difficulty walking 5 minutes<br>without rest |                                | 0.91                             | 38<br>(9.9%)                           | 29<br>(14.0%) | 9<br>(5.1%)   | 0.004                                                          |
| Difficulty climbing stairs                   |                                | 0.92                             | 47<br>(12.3%)                          | 37<br>(17.8%) | 10<br>(5.68%) | 0                                                              |
| Trouble lifting                              |                                | 0.89                             | 77<br>(20.3%)                          | 50<br>(24.5%) | 27<br>(15.3%) | 0.025                                                          |
| Trouble lifting 10 lbs                       |                                | 0.82                             | 36<br>(9.5%)                           | 32<br>(15.5%) | 4<br>(2.3%)   | 0                                                              |

|                                                | Chronbach<br>alpha<br>(IC 95%) | Correlation<br>within<br>cluster | Reported<br>Very often or All the time |               |               | Difference<br>Chi-square/<br>Fisher's<br>Exact test<br>p-value |
|------------------------------------------------|--------------------------------|----------------------------------|----------------------------------------|---------------|---------------|----------------------------------------------------------------|
|                                                |                                |                                  | Overall                                | Women         | Men           |                                                                |
| <b>Cluster 5: Neuro-cognitive deficits</b>     |                                |                                  |                                        |               |               |                                                                |
|                                                | 0.82 (0.79-0.85)               |                                  |                                        |               |               |                                                                |
| Trouble hearing                                |                                | 0.74                             | 48<br>(12.5%)                          | 28<br>(13.6%) | 20<br>(11.2%) | 0.485                                                          |
| Difficulty having his/her speech<br>understood |                                | 0.77                             | 27<br>(7.1%)                           | 17<br>(8.3%)  | 10<br>(5.7%)  | 0.424                                                          |
| Difficulty pronouncing words                   |                                | 0.77                             | 39<br>(10.1%)                          | 21<br>(10.1%) | 18<br>(10.1%) | 0.992                                                          |
| Forget where to put things                     |                                | 0.79                             | 76<br>(19.8%)                          | 50<br>(24.3%) | 26<br>(14.7%) | 0.018                                                          |
| Forget doing things                            |                                | 0.8                              | 35<br>(9.1%)                           | 23<br>(11.1%) | 12<br>(6.8%)  | 0.158                                                          |

|                                         | Chronbach<br>alpha<br>(IC 95%) | Correlation<br>within<br>cluster | Reported<br>Very often or All the time |               |               | Difference<br>Chi-square/<br>Fisher's<br>Exact test<br>p-value |
|-----------------------------------------|--------------------------------|----------------------------------|----------------------------------------|---------------|---------------|----------------------------------------------------------------|
|                                         |                                |                                  | Overall                                | Women         | Men           |                                                                |
| <b>Cluster 6: Affect/Mood disorders</b> |                                |                                  |                                        |               |               |                                                                |
|                                         | 0.9 (0.89-0.91)                |                                  |                                        |               |               |                                                                |
| Anxious                                 |                                | 0.81                             | 57<br>(14.9%)                          | 39<br>(18.9%) | 18<br>(10.2%) | 0.016                                                          |
| Tired                                   |                                | 0.81                             | 111<br>(28.9%)                         | 74<br>(35.9%) | 37<br>(20.9%) | 0.001                                                          |
| Irritable                               |                                | 0.81                             | 50<br>(13.1%)                          | 36<br>(17.5%) | 14<br>(7.9%)  | 0.006                                                          |
| Depressed                               |                                | 0.77                             | 58<br>(15.4%)                          | 36<br>(17.9%) | 22<br>(12.6%) | 0.151                                                          |
| Difficulty concentrating                |                                | 0.78                             | 60<br>(15.9%)                          | 39<br>(19.2%) | 21<br>(12.0%) | 0.054                                                          |
| Wake up at night                        |                                | 0.77                             | 141<br>(36.8%)                         | 86<br>(41.6%) | 55<br>(31.2%) | 0.037                                                          |
| Trouble falling asleep                  |                                | 0.75                             | 138<br>(36.0%)                         | 74<br>(35.8%) | 64<br>(36.4%) | 0.901                                                          |
| Doing nothing                           |                                | 0.72                             | 65<br>(17.0%)                          | 45<br>(21.9%) | 20<br>(11.2%) | 0.005                                                          |

**Supplementary Table 2. Descriptive characteristics of the composite variable in each cluster**

| Clusters                               | Component Score        |                      |                      | Wilcoxon<br>p-value |
|----------------------------------------|------------------------|----------------------|----------------------|---------------------|
|                                        | Mean, Median (min-max) |                      |                      |                     |
|                                        | All                    | Women                | Men                  |                     |
| Cluster 1 (Extrapyramidal impairment)  | 2.7, 2.2<br>(0-11.2)   | 3.0, 2.6<br>(0-1.2)  | 2.3, 1.7<br>(0-9.1)  | 0.002               |
| Cluster 2 (Sensory impairment)         | 2.6, 2.4<br>(0-8.3)    | 2.8, 2.8<br>(0-8.3)  | 2.3, 2.1<br>(0-8.3)  | 0.012               |
| Cluster 3 (Cranial nerve disturbances) | 1.4, 0.9<br>(0-7.9)    | 1.6, 1.0<br>(0-7.9)  | 1.1, 0.4<br>(0-6.9)  | 0.017               |
| Cluster 4 (Gross motor impairment)     | 1.4, 0.7<br>(0-6.6)    | 1.8, 1.1<br>(0-6.6)  | 1.0, 0.3<br>(0-6.2)  | 0.000               |
| Cluster 5 (Neuro-cognitive deficits)   | 2.3, 2.1<br>(0-8.0)    | 2.4, 2.3<br>(0-8.0)  | 2.1, 2.0<br>(0-7.2)  | 0.199               |
| Cluster 6 (Affect/Mood disorders)      | 4.3, 4.3<br>(0-10.4)   | 4.7, 4.9<br>(0-10.4) | 3.8, 4.0<br>(0-10.1) | 0.000               |

**Supplementary Figure 1.** Equivalent mean childhood hair Hg between 5 and 15 years of age with respect to reported childhood fish consumption at around 10 years old (n = 123).

Note: The fitted line represents second order polynomial (quadratic), with a shaded confidence band.

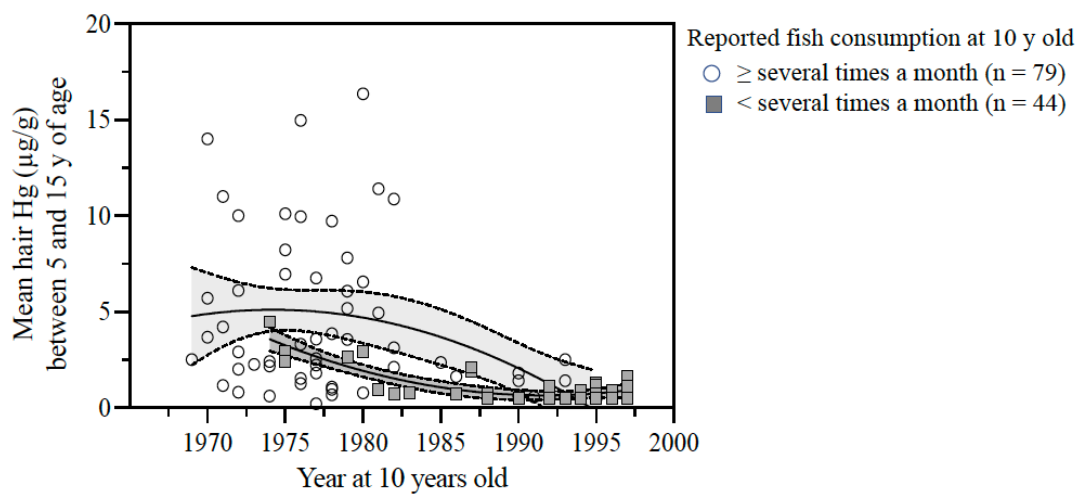



**Supplementary Figure 2.** Graphic outputs for cluster decision

2a. Plot of the aggregation levels of symptom clusters

2b. Plot of stability of the partitions of clusters

2c. Plot of dispersion of the adjusted Rand index

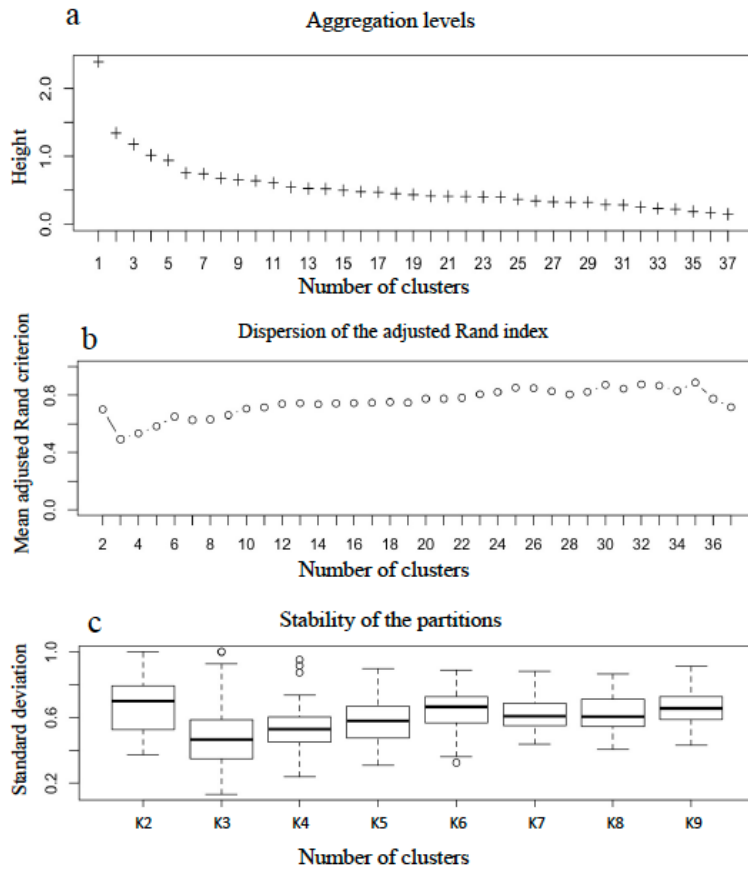

**Supplementary Figures 3-7.** SEM path diagrams linking retrospective latent Hg exposure and covariates to the latent symptoms cluster variables for Sensory Impairment (3), Cranial nerve disturbances (4), Gross motor impairment (5), Neuro-cognitive deficits (6) and Affect/Mood disorders (7). The latent variable (Latent Hg) binds prenatal, childhood Hg exposure and having had  $\geq 5\mu\text{g/g}$  hair Hg at least once between 1970 and 1997.

Abbreviations:  $\chi^2/\text{df}$ : Chi-square divided by the degrees of freedom ( $\chi^2/\text{df}$ ), CFI: Comparative Fit Index, TLI: Tucker Lewis Index, RMSEA: Root Mean Square Error of Approximation, SRMR: Standardized Root Mean Square Residual.

**Supplementary Figures 8-12.** SEM path diagrams linking retrospective Hg exposure parameters (prenatal, childhood Hg exposure, and having had  $5\mu\text{g/g}$  hair Hg exposure at least once between 1970 and 1997) and covariates with latent symptoms cluster variables for Sensory Impairment (8), Cranial nerve disturbances (9), Gross motor impairment (10), Neuro-cognitive deficits (11), Affect/Mood disorders (12).

Abbreviations:  $\chi^2/\text{df}$ : Chi-square divided by the degrees of freedom ( $\chi^2/\text{df}$ ), CFI: Comparative Fit Index, TLI: Tucker Lewis Index, RMSEA: Root Mean Square Error of Approximation, SRMR: Standardized Root Mean Square Residual.

**Supplementary Figure 3.** SEM path diagram linking retrospective latent Hg exposure and covariates to the latent symptoms cluster variable for Sensory impairment

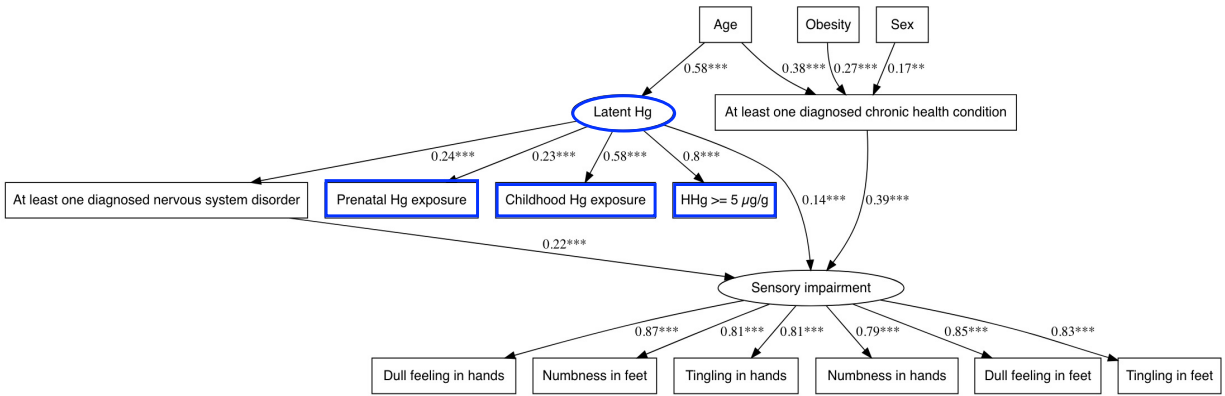

Goodness of fit:  $\chi^2/df=1.00$ , CFI=1.00, TLI=1.00, RMSEA=0.0 (0.01-0.04), SRMR=0.05

**Supplementary Figure 4.** SEM path diagram linking retrospective latent Hg exposure and covariates to the latent symptoms cluster variable for Cranial nerve disturbances

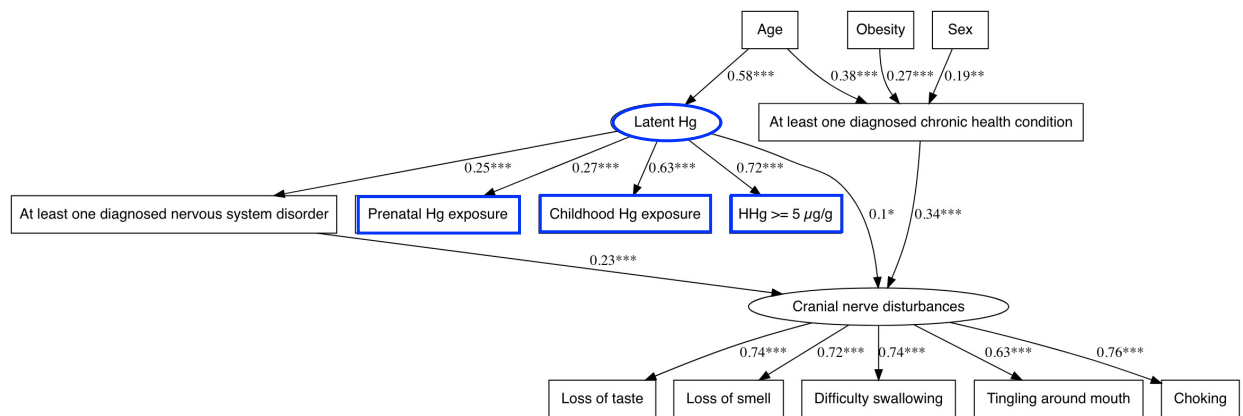

Goodness of fit:  $\chi^2/df=1.27$ , CFI=0.98, TLI=0.97, RMSEA=0.03 (0.00-0.05), SRMR=0.06

**Supplementary Figure 5.** SEM path diagram linking retrospective latent Hg exposure and covariates to the latent symptoms cluster variable for Gross motor impairment

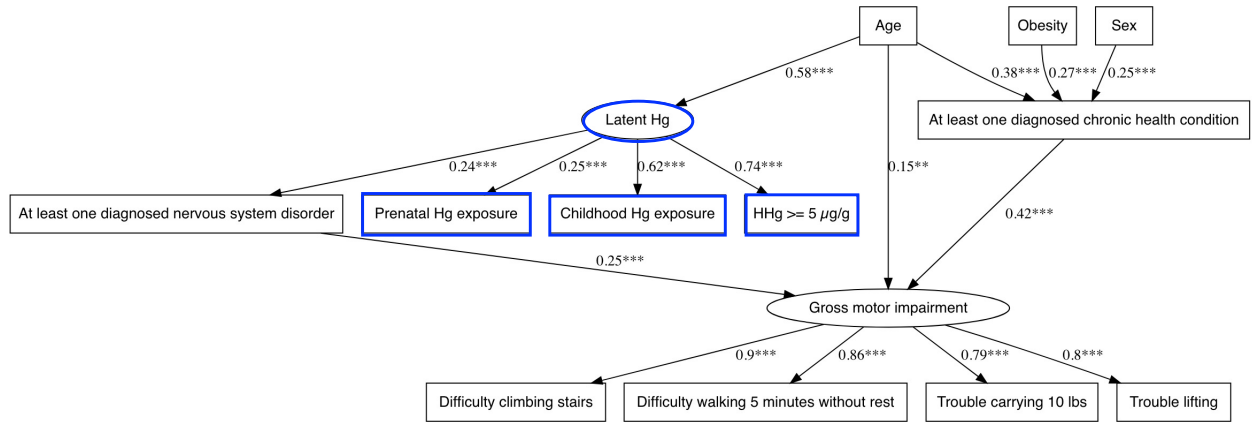

Goodness of fit:  $\chi^2/df=1.46$ , CFI=0.98, TLI=0.97, RMSEA=0.04 (0.02-0.06), SRMR=0.06

**Supplementary Figure 6.** SEM path diagram linking retrospective latent Hg exposure and covariates to the latent symptoms cluster variable for Neuro-cognitive deficits

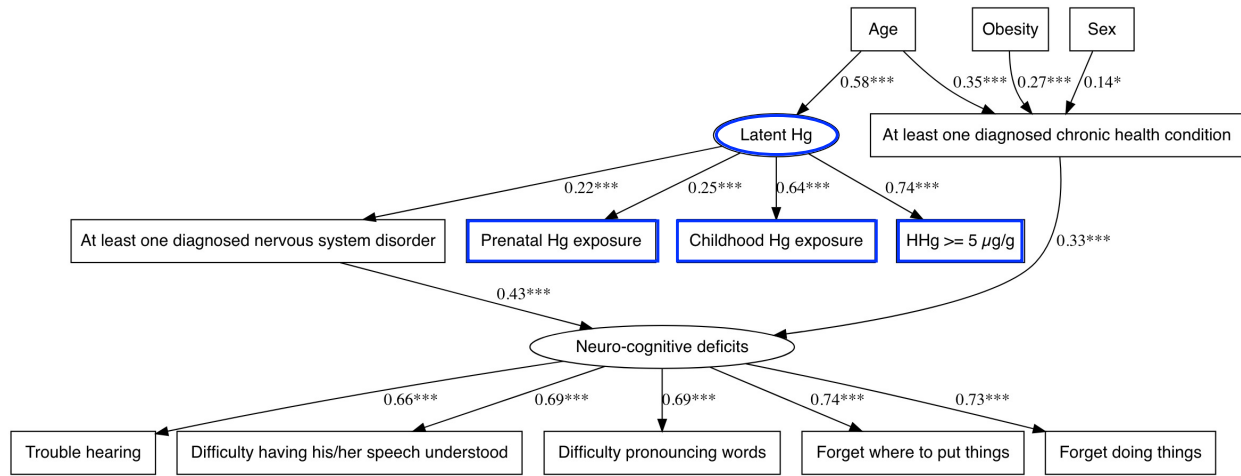

Goodness of fit:  $\chi^2/df=1.45$ , CFI=0.97, TLI=0.96, RMSEA=0.04 (0.02-0.06), SRMR=0.06

**Supplementary Figure 7.** SEM path diagram linking retrospective latent Hg exposure and covariates to the latent symptoms cluster variable for Affect/Mood disorders

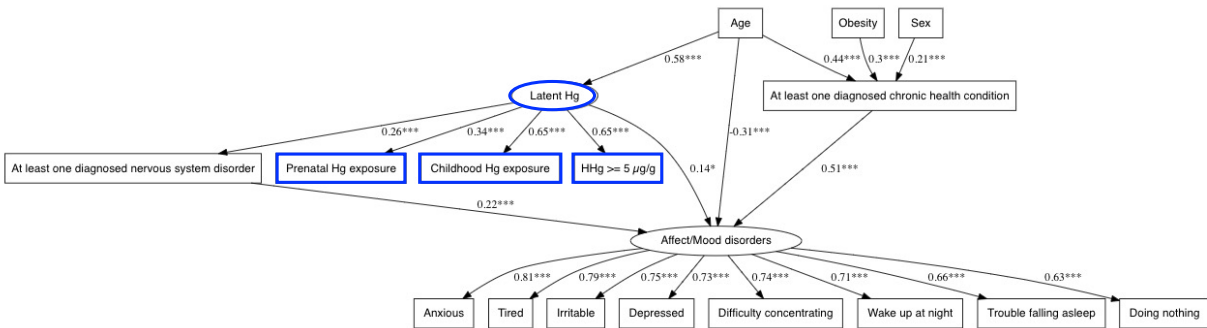

Goodness of fit:  $\chi^2/df=1.33$ , CFI=0.99, TLI=0.98, RMSEA=0.04 (0.02-0.05), SRMR=0.06

**Supplementary Figure 8.** SEM path diagram linking retrospective Hg exposure parameters (prenatal and childhood Hg exposure, and having had  $\geq 5\mu\text{g/g}$  hair Hg at least once between 1970 and 1997) and covariates to the latent symptoms cluster variable for Sensory impairment

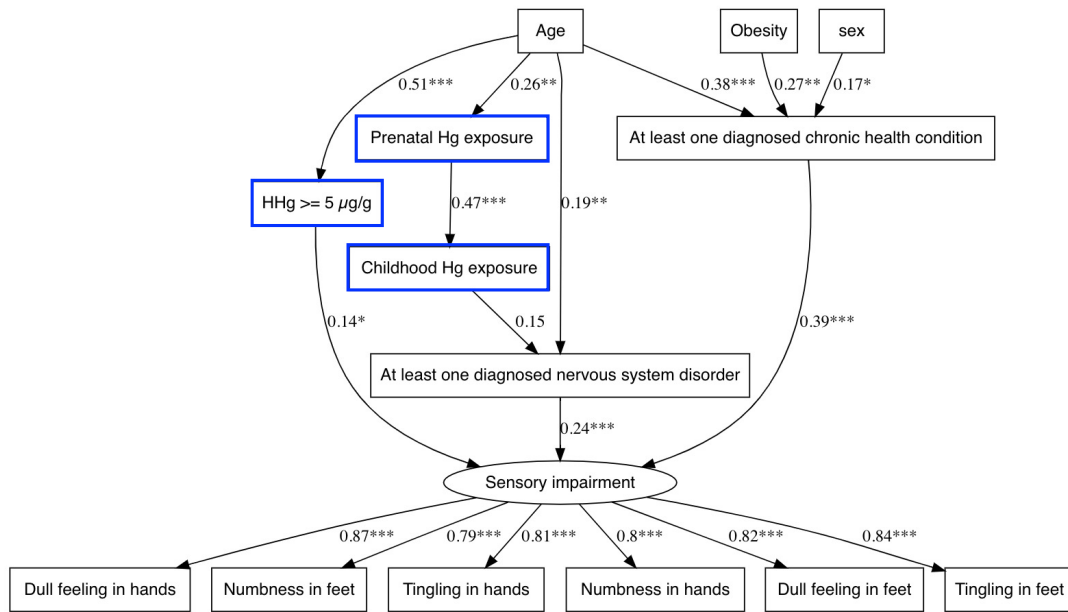

Goodness of fit:  $\chi^2/\text{df}=1.72$ , CFI=0.97, TLI=0.97, RMSEA=0.05 (0.04-0.07), SRMR=0.07



**Supplementary Figure 9.** SEM path diagram linking retrospective Hg exposure parameters (prenatal and childhood Hg exposure, and having had  $\geq 5\mu\text{g/g}$  hair Hg at least once between 1970 and 1997) and covariates to the latent symptoms cluster variable for Cranial nerve impairment

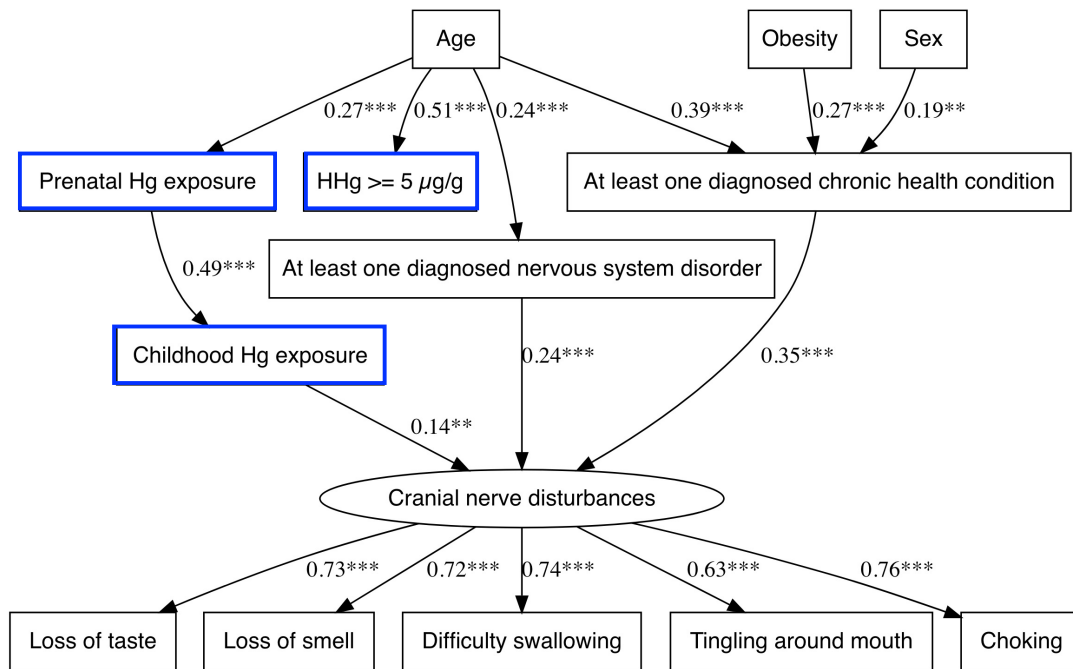

Goodness of fit:  $\chi^2/\text{df}=2.05$ , CFI=0.92, TLI=0.90, RMSEA=0.07 (0.05-0.08), SRMR=0.07

**Supplementary Figure 10.** SEM path diagram linking retrospective Hg exposure parameters (prenatal and childhood Hg exposure, and having had  $\geq 5\mu\text{g/g}$  hair Hg at least once between 1970 and 1997) and covariates to the latent symptoms cluster variable for Gross motor impairment

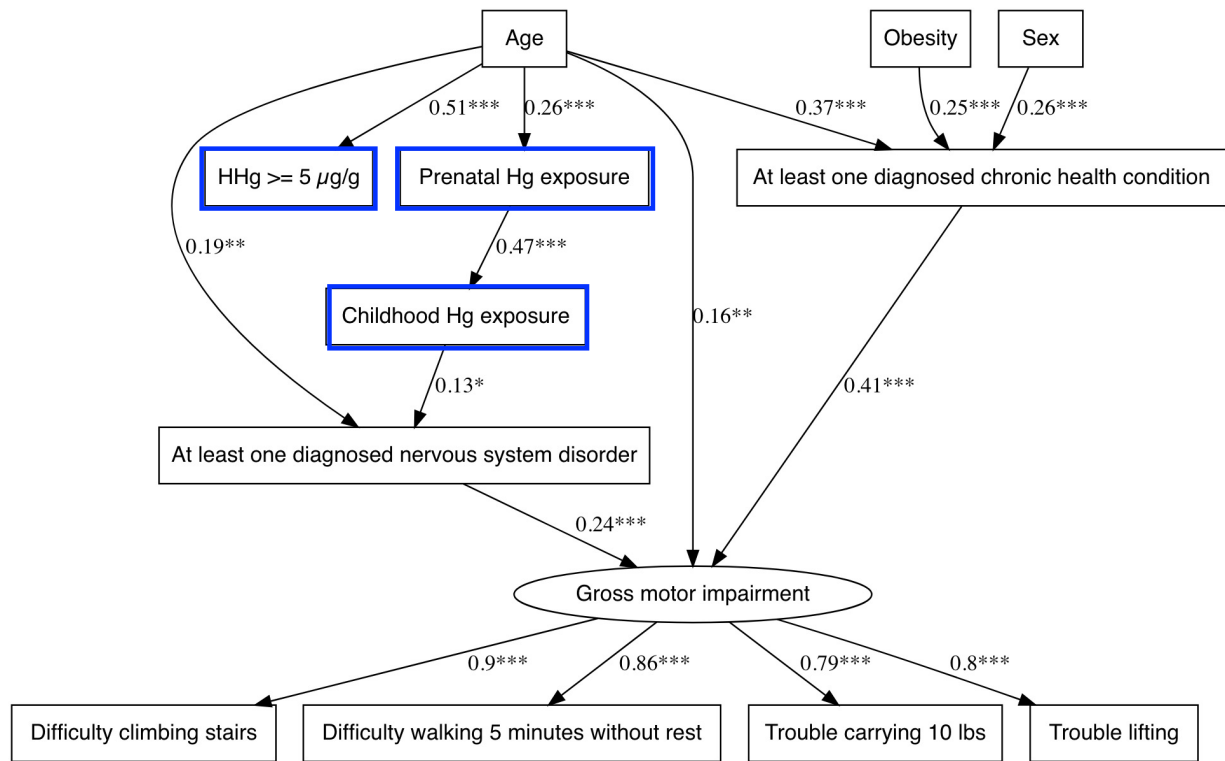

Goodness of fit:  $\chi^2/\text{df}=2.47$ , CFI=0.93, TLI=0.91, RMSEA=0.08 (0.06-0.09), SRMR=0.08

**Supplementary Figure 11.** SEM path diagram linking retrospective Hg exposure parameters (prenatal and childhood Hg exposure, and having had  $\geq 5\mu\text{g/g}$  hair Hg at least once between 1970 and 1997) and covariates to the latent symptoms cluster variable for Neuro-cognitive deficits

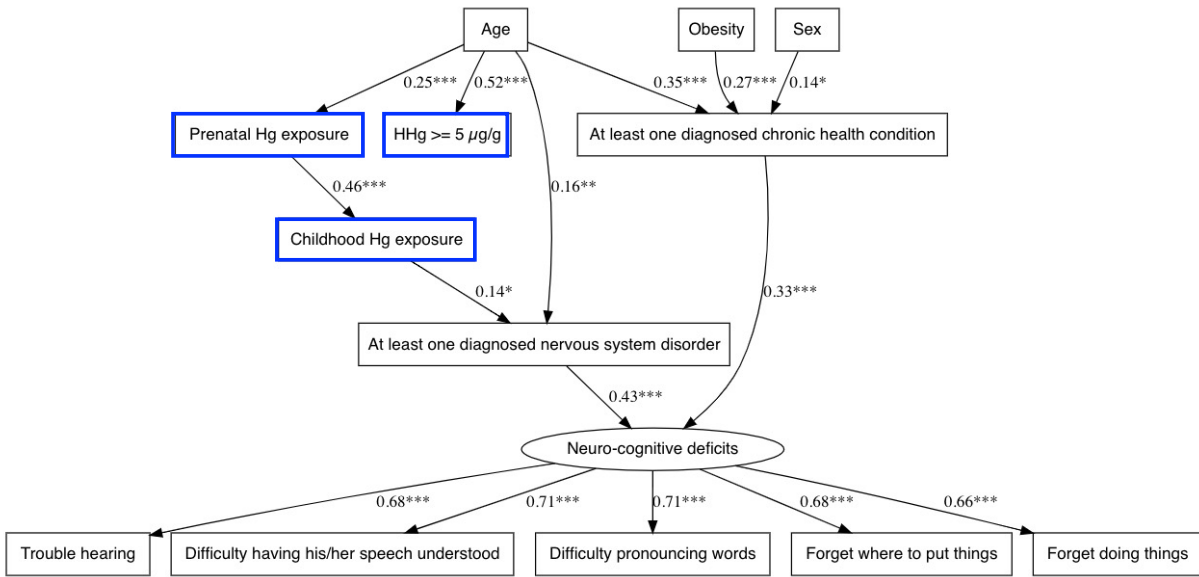

Goodness of fit:  $\chi^2/\text{df}=2.23$ , CFI=0.92, TLI=0.90, RMSEA=0.07 (0.05-0.09), SRMR=0.08

**Supplementary Figure 12.** SEM path diagram linking retrospective Hg exposure parameters (prenatal and childhood Hg exposure, and having had  $\geq 5\mu\text{g/g}$  hair Hg at least once between 1970 and 1997) and covariates to the latent symptoms cluster variable for Affect/Mood disorders

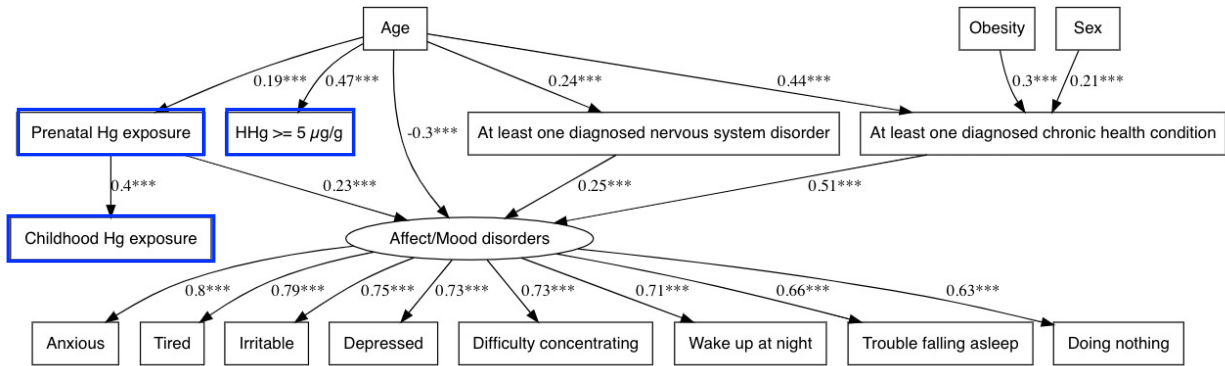

Goodness of fit:  $\chi^2/\text{df}=1.07$ , CFI=0.99, TLI=0.98, RMSEA=0.02 (0.00-0.04), SRMR=0.05
